# Supplementary material for: Proteogenomic Analysis of Mycobacterium smegmatis Using High Resolution Mass Spectrometry
Source: Front Microbiol. 2016 Apr 5;7:427. doi: 10.3389/fmicb.2016.00427 (PMC4821088; doi:10.3389/fmicb.2016.00427)
Supplement: Supplementary Table 8 — Novel ORF ICDSs. [file Table8.xlsx]

## Sheet: Supplementary Table 8. Novel 
Novel ORF ID	Leading_Protein_ID Six_Frame_database	Unique_Peptides Six_Frame_database	Non_Unique_Peptides Six_Frame_database	PEP Six_Frame_database	Group_Members Six_Frame_database	Leading_Protein_ID Reference_proteome	Unique_Peptides Reference_proteome	Non_Unique_Peptides Reference_proteome	PEP Reference_proteome	Group_Members Reference_proteome	Leading_Protein_ID GeneMarkS_database	Unique_Peptides GeneMarkS_database	Non_Unique_Peptides GeneMarkS_database	PEP GeneMarkS_database	Group_Members GeneMarkS_database	Sequence_Start_Found	Most_Upstream_ID(s)	Reference IDs Mapped	Consensus Sequence	Consensus Coordinates	Consensus Start Codon	Consensus Start Translation	Consensus N-terminal Peptide Non-tryptic	Annotation_Type	Non-tryptic N-terminal Peptides	Non-tryptic N-terminal Peptides (Count)	Acetyl (Protein N-term) Peptides	Oxidation (M) Peptides	Stage Unique: Mid Log	Combined N-terminal Peptides	Combined N-terminal Peptides (count)	Stage Unique: Early Stationary	Non-Redundant Peptide Set	Alternate Start Translations	Specific Peptides	Validation Evidence	Upstream Evidence	Downstream Evidence	Frameshift Proteins	Frameshift Peptides	GSSP Peptides	Annotated Peptides	Alternate Start Peptides	Penultimate Met-AP Amino Acids	Multiple Initiation	Sequence	nr blastp	Sequence Length	Sequence Coverage (%)
36	>CP000480|M_START_Six_Frame_Translated_Orf_77899 (-)6600484:6601626 mreeaaidvegalddvwtsaphpvivadaegvirsasdaardalpglrtgrhlsdcapwl weahvrhgdagpaqtetgpdgctarptplprGEVAWWLFPAGRagavtdagrelravere lrrereranfldevsavlmaslnadrcmeaivrvavprLADGAVVIAPPSGPRldmvcta gtvehrSVEADPATVAGLTEALRgfppvpsrWIDPNSVPDWLIPRdltgtvgsvvvtplp ghgvpagalvllrhsaksafddgeevfarlfaaragaalsaarLYAEQAAITRtlmdell ppkLAHQHGIEIAGGYRaaedhqtvg…	GEVAWWLFPAGR LADGAVVIAPPSGPR LAHQHGIEIAGGYR LYAEQAAITR SVEADPATVAGLTEALR WIDPNSVPDWLIPR		1.8062e-16	1						>CP000480|M_START_GeneMarkS_Sequence_6128 (-)6600484:6601626 mreeaaidvegalddvwtsaphpvivadaegvirsasdaardalpglrtgrhlsdcapwl weahvrhgdagpaqtetgpdgctarptplprGEVAWWLFPAGRagavtdagrelravere lrrereranfldevsavlmaslnadrcmeaivrvavprLADGAVVIAPPSGPRldmvcta gtvehrSVEADPATVAGLTEALRgfppvpsrWIDPNSVPDWLIPRdltgtvgsvvvtplp ghgvpagalvllrhsakSAFDDGEEVFARlfaaragaalsaarLYAEQAAITRtlmdell ppkLAHQHGIEIAGGYRaaedhqtvggdfydvh…	GEVAWWLFPAGR LADGAVVIAPPSGPR LAHQHGIEIAGGYR LYAEQAAITR SAFDDGEEVFAR SVEADPATVAGLTEALR WIDPNSVPDWLIPR		5.54e-21	1		Six Frame database GeneMarkS database		>Consensus_Protein_Sequence_2778 (-)6600484:6601362 mprGEVAWWLFPAGRagavtdagrelraverelrrereranfldevsavlmaslnadrcm eaivrvavprLADGAVVIAPPSGPRldmvctagtvehrSVEADPATVAGLTEALRgfppv psrWIDPNSVPDWLIPRdltgtvgsvvvtplpghgvpagalvllrhsakSAFDDGEEVFA RlfaaragaalsaarLYAEQAAITRtlmdellppkLAHQHGIEIAGGYRaaedhqtvggd fydvhpattpddetlvysetcaervwtqrsspersatpcrrsrrwptttavc	(-)6600484:6601362	TTG	Not Verified		Novel		0					0		_SVEADPATVAGLTEALR_ _GEVAWWLFPAGR_ _LADGAVVIAPPSGPR_ _LYAEQAAITR_ _WIDPNSVPDWLIPR_ _SAFDDGEEVFAR_ _LAHQHGIEIAGGYR_	FALSE	GEVAWWLFPAGR WIDPNSVPDWLIPR SVEADPATVAGLTEALR LADGAVVIAPPSGPR LYAEQAAITR LAHQHGIEIAGGYR SAFDDGEEVFAR						GEVAWWLFPAGR WIDPNSVPDWLIPR SAFDDGEEVFAR SVEADPATVAGLTEALR LADGAVVIAPPSGPR LYAEQAAITR LAHQHGIEIAGGYR				FALSE	MPRGEVAWWLFPAGRAGAVTDAGRELRAVERELRRERERANFLDEVSAVLMASLNADRCMEAIVRVAVPRLADGAVVIAPPSGPRLDMVCTAGTVEHRSVEADPATVAGLTEALRGFPPVPSRWIDPNSVPDWLIPRDLTGTVGSVVVTPLPGHGVPAGALVLLRHSAKSAFDDGEEVFARLFAARAGAALSAARLYAEQAAITRTLMDELLPPKLAHQHGIEIAGGYRAAEDHQTVGGDFYDVHPATTPDDETLVYSETCAERVWTQRSSPERSATPCRRSRRWPTTTAVC	Alignment E value: 6.13852e-175, length: 547, Feature: gi|504691581|ref|WP_014878683.1| hypothetical protein [Mycobacterium smegmatis] >gi|116266964|gb|ABJ96328.1| unknown [Mycobacterium smegmatis str. MC2 155] >gi|399235301|gb|AFP42794.1| hypothetical protein MSMEI_6368 [Mycobacterium smegmatis str. MC2 155] >gi|698944756|gb|AIU11518.1| serine/threonine protein phosphatase [Mycobacterium smegmat…	292	32.19
0	>CP000480|M_START_Six_Frame_Translated_Orf_46964 (-)6599984:6600583 mcgkgldaavltgkIRNTLQALAPLADDHGRvlrllnrallsaahtrfatvvlasaarrd ddvalrLTSAGHMSPLIVRrdgsveeagtrgmlvgavpeitattcetilepgetcllytd gvtearGGPMGNEMFGEERlaaalsecaglpaeavverIMMLTAEWIRqrghddvavvai taprrgrraesvlrsevrr	GGPMGNEMFGEER IMMLTAEWIR IRNTLQALAPLADDHGR LTSAGHMSPLIVR		1.0481e-11	1						>CP000480|M_START_GeneMarkS_Sequence_2866 (-)6599984:6600511 maddhgrvlrllnrALLSAAHTRfatvvlasaarrdddvalrLTSAGHMSPLIVRrdgsv eeagtrgmlvgavpeitattcetilepgetcllytdgvtearGGPMGNEMFGEERlaaal secaglpaeavverIMMLTAEWIRqrghddvavvaitaprrgrraesvlrsevrr	ALLSAAHTR GGPMGNEMFGEER IMMLTAEWIR LTSAGHMSPLIVR		3.2191e-10	1		Six Frame database		>Consensus_Protein_Sequence_1504 (-)6599984:6600583 mcgkgldaavltgkIRNTLQALAPLADDHGRvlrllnrALLSAAHTRfatvvlasaarrd ddvalrLTSAGHMSPLIVRrdgsveeagtrgmlvgavpeitattcetilepgetcllytd gvtearGGPMGNEMFGEERlaaalsecaglpaeavverIMMLTAEWIRqrghddvavvai taprrgrraesvlrsevrr	(-)6599984:6600583	GTG	Not Verified		Novel		0					0		_GGPMGNEMFGEER_ _ALLSAAHTR_ _IMMLTAEWIR_ _IRNTLQALAPLADDHGR_ _LTSAGHMSPLIVR_	FALSE	GGPMGNEMFGEER LTSAGHMSPLIVR IRNTLQALAPLADDHGR IMMLTAEWIR ALLSAAHTR						GGPMGNEMFGEER IMMLTAEWIR IRNTLQALAPLADDHGR ALLSAAHTR LTSAGHMSPLIVR				FALSE	MCGKGLDAAVLTGKIRNTLQALAPLADDHGRVLRLLNRALLSAAHTRFATVVLASAARRDDDVALRLTSAGHMSPLIVRRDGSVEEAGTRGMLVGAVPEITATTCETILEPGETCLLYTDGVTEARGGPMGNEMFGEERLAAALSECAGLPAEAVVERIMMLTAEWIRQRGHDDVAVVAITAPRRGRRAESVLRSEVRR	Alignment E value: 1.44568e-129, length: 547, Feature: gi|504691581|ref|WP_014878683.1| hypothetical protein [Mycobacterium smegmatis] >gi|116266964|gb|ABJ96328.1| unknown [Mycobacterium smegmatis str. MC2 155] >gi|399235301|gb|AFP42794.1| hypothetical protein MSMEI_6368 [Mycobacterium smegmatis str. MC2 155] >gi|698944756|gb|AIU11518.1| serine/threonine protein phosphatase [Mycobacterium smegmat…	199	31.16
20	>CP000480|M_START_Six_Frame_Translated_Orf_55384 (-)3262869:3263801 mtmtrpvlstyrlqmrgdcctfddavnlldhlddlgvshvylspiltaaegsthgydvtd pttvspalggpdglrrlseaararGMGLIVDIVPNHVGVARADENPWWWDVLTHGRssry adffdidwdlevdgqsgrivlpilgsdddvadltvdgdilrLGDLALPIAPGTGSGTGAE VHDLQHYRligwrrgicgyrrFFSITSLAALRQEDHAVFDATHTEVKRWFDEGLVDGVRI DHPDGLTDPAGYLAWLREIAGPSAWIVVEKilafdealdtalpvagttgydalreiggvf idpngagpld	ADENPWWWDVLTHGR EIAGPSAWIVVEK FFSITSLAALR GMGLIVDIVPNHVGVAR IDHPDGLTDPAGYLAWLR LGDLALPIAPGTGSGTGAEVHDLQHYR QEDHAVFDATHTEVK RWFDEGLVDGVR		7.704e-27	1						>CP000480|M_START_GeneMarkS_Sequence_2805 (-)3262869:3263795 mtrpvlstyrlqmrgdcctfddavnlldhlddlgvshvylspiltaaegsthgydvtdpt tvspalggpdglrrlseaararGMGLIVDIVPNHVGVARADENPWWWDVLTHGRssryad ffdidwdlevdgqsgrivlpilgsdddvadltvdgdilrLGDLALPIAPGTGSGTGAEVH DLQHYRligwrrgicgyrrFFSITSLAALRQEDHAVFDATHTEVKRWFDEGLVDGVRIDH PDGLTDPAGYLAWLREIAGPSAWIVVEKilafdealdtalpvagttgydalreiggvfid pngagpld	ADENPWWWDVLTHGR EIAGPSAWIVVEK FFSITSLAALR GMGLIVDIVPNHVGVAR IDHPDGLTDPAGYLAWLR LGDLALPIAPGTGSGTGAEVHDLQHYR QEDHAVFDATHTEVK RWFDEGLVDGVR		6.2548e-32	1		Six Frame database GeneMarkS database		>Consensus_Protein_Sequence_1861 (-)3262869:3263684 mylspiltaaegsthgydvtdpttvspalggpdglrrlseaararGMGLIVDIVPNHVGV ARADENPWWWDVLTHGRssryadffdidwdlevdgqsgrivlpilgsdddvadltvdgdi lrLGDLALPIAPGTGSGTGAEVHDLQHYRligwrrgicgyrrFFSITSLAALRQEDHAVF DATHTEVKRWFDEGLVDGVRIDHPDGLTDPAGYLAWLREIAGPSAWIVVEKilafdeald talpvagttgydalreiggvfidpngagpld	(-)3262869:3263684	GTG	Not Verified		Novel		0					0		_EIAGPSAWIVVEK_ _GMGLIVDIVPNHVGVAR_ _ADENPWWWDVLTHGR_ _IDHPDGLTDPAGYLAWLR_ _RWFDEGLVDGVR_ _LGDLALPIAPGTGSGTGAEVHDLQHYR_ _FFSITSLAALR_ _QEDHAVFDATHTEVK_	FALSE	EIAGPSAWIVVEK RWFDEGLVDGVR IDHPDGLTDPAGYLAWLR QEDHAVFDATHTEVK FFSITSLAALR ADENPWWWDVLTHGR LGDLALPIAPGTGSGTGAEVHDLQHYR GMGLIVDIVPNHVGVAR						EIAGPSAWIVVEK RWFDEGLVDGVR IDHPDGLTDPAGYLAWLR QEDHAVFDATHTEVK FFSITSLAALR ADENPWWWDVLTHGR LGDLALPIAPGTGSGTGAEVHDLQHYR GMGLIVDIVPNHVGVAR				FALSE	MYLSPILTAAEGSTHGYDVTDPTTVSPALGGPDGLRRLSEAARARGMGLIVDIVPNHVGVARADENPWWWDVLTHGRSSRYADFFDIDWDLEVDGQSGRIVLPILGSDDDVADLTVDGDILRLGDLALPIAPGTGSGTGAEVHDLQHYRLIGWRRGICGYRRFFSITSLAALRQEDHAVFDATHTEVKRWFDEGLVDGVRIDHPDGLTDPAGYLAWLREIAGPSAWIVVEKILAFDEALDTALPVAGTTGYDALREIGGVFIDPNGAGPLD	Alignment E value: 0.0, length: 758, Feature: gi|504690499|ref|WP_014877601.1| maltooligosyl trehalose synthase [Mycobacterium smegmatis] >gi|116266942|gb|ABJ96317.1| putative maltooligosyltrehalose synthase [Mycobacterium smegmatis str. MC2 155] >gi|399232074|gb|AFP39567.1| Maltooligosyltrehalose synthase [Mycobacterium smegmatis str. MC2 155] >gi|698941575|gb|AIU08337.1| maltooligosyl trehalose…	271	47.23
3	>CP000480|M_START_Six_Frame_Translated_Orf_19493 (-)3261518:3262867 mcadvevasehdlkRAAVTDILGSELARvcrtitratgrrdprLADAVAALVSHIGVYRc dyptlsallpvalarTASAAPDLADALDTVSAAYATSAEVAARlnqlcgaatakavedcl fyrdprlvslnevggepalfgvttaefhqraatrarFWPTAMTTLSTHDTKrgedvrari gvlsqvpglwaelvtqwseiapppdlgtglflwqnifgvwpsdgevtdelrgrlhayaek amreagtktswndpdtafedavhswvdavldgpvgagltelvtrlerharsdslaqklla ltapgvpdvyqgtelaedslvdpdnr…	ADELFAELPVALLER FWPTAMTTLSTHDTK LADAVAALVSHIGVYR RAAVTDILGSELAR TASAAPDLADALDTVSAAYATSAEVAAR		1.5325e-28	1						>CP000480|M_START_GeneMarkS_Sequence_6395 (-)3261518:3262867 mcadvevasehdlkRAAVTDILGSELARvcrtitratgrrdprLADAVAALVSHIGVYRc dyptlsallpvalarTASAAPDLADALDTVSAAYATSAEVAARlnqlcgaatakavedcl fyrdprlvslnevggepalfgvttaefhqraatrarFWPTAMTTLSTHDTKrgedvrari gvlsqvpglwaelvtqwseiapppdlgtglflwqnifgvwpsdgevtdelrgrlhayaek amreagtktswndpdtafedavhswvdavldgpvgagltelvtrlerharsdslaqklla ltapgvpdvyqgtelaedslvdpdnrrpidypa…	ADELFAELPVALLER FWPTAMTTLSTHDTK LADAVAALVSHIGVYR RAAVTDILGSELAR TASAAPDLADALDTVSAAYATSAEVAAR		5.8767e-33	1		Six Frame database GeneMarkS database		>Consensus_Protein_Sequence_400 (-)3261518:3262849 masehdlkRAAVTDILGSELARvcrtitratgrrdprLADAVAALVSHIGVYRcdyptls allpvalarTASAAPDLADALDTVSAAYATSAEVAARlnqlcgaatakavedclfyrdpr lvslnevggepalfgvttaefhqraatrarFWPTAMTTLSTHDTKrgedvrarigvlsqv pglwaelvtqwseiapppdlgtglflwqnifgvwpsdgevtdelrgrlhayaekamreag tktswndpdtafedavhswvdavldgpvgagltelvtrlerharsdslaqkllaltapgv pdvyqgtelaedslvdpdnrrpidypahraalqagtdakmrvt…	(-)3261518:3262849	GTG	Not Verified		Novel		0					0		_FWPTAMTTLSTHDTK_ _RAAVTDILGSELAR_ _LADAVAALVSHIGVYR_ _TASAAPDLADALDTVSAAYATSAEVAAR_ _ADELFAELPVALLER_	FALSE	TASAAPDLADALDTVSAAYATSAEVAAR RAAVTDILGSELAR FWPTAMTTLSTHDTK ADELFAELPVALLER LADAVAALVSHIGVYR						FWPTAMTTLSTHDTK RAAVTDILGSELAR TASAAPDLADALDTVSAAYATSAEVAAR ADELFAELPVALLER LADAVAALVSHIGVYR				FALSE	MASEHDLKRAAVTDILGSELARVCRTITRATGRRDPRLADAVAALVSHIGVYRCDYPTLSALLPVALARTASAAPDLADALDTVSAAYATSAEVAARLNQLCGAATAKAVEDCLFYRDPRLVSLNEVGGEPALFGVTTAEFHQRAATRARFWPTAMTTLSTHDTKRGEDVRARIGVLSQVPGLWAELVTQWSEIAPPPDLGTGLFLWQNIFGVWPSDGEVTDELRGRLHAYAEKAMREAGTKTSWNDPDTAFEDAVHSWVDAVLDGPVGAGLTELVTRLERHARSDSLAQKLLALTAPGVPDVYQGTELAEDSLVDPDNRRPIDYPAHRAALQAGTDAKMRVTTAALQLRRDRPQTFLAGGHTPLHANGAAADHVISYLRGDDVVVAVSRWTVALAEAG…	Alignment E value: 0.0, length: 758, Feature: gi|504690499|ref|WP_014877601.1| maltooligosyl trehalose synthase [Mycobacterium smegmatis] >gi|116266942|gb|ABJ96317.1| putative maltooligosyltrehalose synthase [Mycobacterium smegmatis str. MC2 155] >gi|399232074|gb|AFP39567.1| Maltooligosyltrehalose synthase [Mycobacterium smegmatis str. MC2 155] >gi|698941575|gb|AIU08337.1| maltooligosyl trehalose…	443	19.86
4	>CP000480|M_START_Six_Frame_Translated_Orf_21115 (-)3961466:3961900 mvthrgrwylvghdrdredtrtfrlsrISAAARPIGPAGAVQKPQDVNLRdivrRAVAEQ PTGERarIWIAGGRatalrrqavtstprtiggrageeitvdigtwdrlarEIASYGSDAV ALEPSSLRDDVVERlrahaagger	AVAEQPTGER EIASYGSDAVALEPSSLRDDVVER ISAAARPIGPAGAVQKPQDVNLR IWIAGGR RAVAEQPTGER		5.3003e-23	1						>CP000480|M_START_GeneMarkS_Sequence_6584 (-)3961466:3961744 mrRAVAEQPTGERarIWIAGGRatalrrqavtstprtiggrageeitvdigtwdrlarEI ASYGSDAVALEPSSLRDDVVERlrahaagger	AVAEQPTGER EIASYGSDAVALEPSSLRDDVVER IWIAGGR RAVAEQPTGER		4.4901e-20	1		Six Frame database		>Consensus_Protein_Sequence_459 (-)3961466:3961897 mthrgrwylvghdrdredtrtfrlsrISAAARPIGPAGAVQKPQDVNLRdivrRAVAEQP TGERarIWIAGGRatalrrqavtstprtiggrageeitvdigtwdrlarEIASYGSDAVA LEPSSLRDDVVERlrahaagger	(-)3961466:3961897	GTG	Not Verified		Novel		0					0		_AVAEQPTGER_ _IWIAGGR_ _ISAAARPIGPAGAVQKPQDVNLR_ _RAVAEQPTGER_ _EIASYGSDAVALEPSSLRDDVVER_	FALSE	AVAEQPTGER EIASYGSDAVALEPSSLRDDVVER RAVAEQPTGER ISAAARPIGPAGAVQKPQDVNLR IWIAGGR						AVAEQPTGER EIASYGSDAVALEPSSLRDDVVER ISAAARPIGPAGAVQKPQDVNLR IWIAGGR RAVAEQPTGER				FALSE	MTHRGRWYLVGHDRDREDTRTFRLSRISAAARPIGPAGAVQKPQDVNLRDIVRRAVAEQPTGERARIWIAGGRATALRRQAVTSTPRTIGGRAGEEITVDIGTWDRLAREIASYGSDAVALEPSSLRDDVVERLRAHAAGGER	Alignment E value: 2.12999e-91, length: 331, Feature: gi|489992283|ref|WP_003895340.1| WYL domain-containing protein [Mycobacterium smegmatis] >gi|116266948|gb|ABJ96320.1| putative transcriptional regulator [Mycobacterium smegmatis str. MC2 155] >gi|399232764|gb|AFP40257.1| Transcriptional regulator-like protein [Mycobacterium smegmatis str. MC2 155] >gi|440626359|gb|ELQ88189.1| protein pafB [Myc…	143	45.45
15	>CP000480|M_START_Six_Frame_Translated_Orf_35841 (-)3961710:3962462 mavskverlmnlviallstrTYLPAEKirttvagyadspsdeafsrmferdknelrDLGI PLETGRvskwdstegyrinrdsyalppigltadeaaavavatqlwqspelvtatqnavlk lraagvdvdadgvgvaiastatlpgvrGSEEVLQSLLSAIDEGRAVQFEHRPSRsadytt rtvepwgrgdpsrplvprrprprprghqnlpafthqrrgpadrpgrggaetpgrqparhr aprrrrtahg	AVQFEHRPSR DLGIPLETGR GSEEVLQSLLSAIDEGR TYLPAEK		1.9314e-29	1						>CP000480|M_START_GeneMarkS_Sequence_4197 (-)3961710:3962462 mavskverlmnlviallstrTYLPAEKirttvagyadspsdeafsrmferdknelrDLGI PLETGRvskwdstegyrinrdsyalppigltadeaaavavatqlwqspelvtatqnavlk lraagvdvdadgvgvaiastatlpgvrGSEEVLQSLLSAIDEGRAVQFEHRPSRsadytt rtvepwgrgdpsrplvprrprprprghqnlpafthqrrgpadrpgrggaetpgrqparhr aprrrrtahg	AVQFEHRPSR DLGIPLETGR GSEEVLQSLLSAIDEGR TYLPAEK		1.2678e-30	1		Six Frame database GeneMarkS database		>Consensus_Protein_Sequence_1069 (-)3961710:3962414 mstrTYLPAEKirttvagyadspsdeafsrmferdknelrDLGIPLETGRvskwdstegy rinrdsyalppigltadeaaavavatqlwqspelvtatqnavlklraagvdvdadgvgva iastatlpgvrGSEEVLQSLLSAIDEGRAVQFEHRPSRsadyttrtvepwgrgdpsrplv prrprprprghqnlpafthqrrgpadrpgrggaetpgrqparhraprrrrtahg	(-)3961710:3962414	TTG	Not Verified		Novel		0					0		_GSEEVLQSLLSAIDEGR_ _TYLPAEK_ _AVQFEHRPSR_ _DLGIPLETGR_	FALSE	GSEEVLQSLLSAIDEGR AVQFEHRPSR DLGIPLETGR TYLPAEK						GSEEVLQSLLSAIDEGR AVQFEHRPSR DLGIPLETGR TYLPAEK				FALSE	MSTRTYLPAEKIRTTVAGYADSPSDEAFSRMFERDKNELRDLGIPLETGRVSKWDSTEGYRINRDSYALPPIGLTADEAAAVAVATQLWQSPELVTATQNAVLKLRAAGVDVDADGVGVAIASTATLPGVRGSEEVLQSLLSAIDEGRAVQFEHRPSRSADYTTRTVEPWGRGDPSRPLVPRRPRPRPRGHQNLPAFTHQRRGPADRPGRGGAETPGRQPARHRAPRRRRTAHG	Alignment E value: 1.79687e-113, length: 331, Feature: gi|489992283|ref|WP_003895340.1| WYL domain-containing protein [Mycobacterium smegmatis] >gi|116266948|gb|ABJ96320.1| putative transcriptional regulator [Mycobacterium smegmatis str. MC2 155] >gi|399232764|gb|AFP40257.1| Transcriptional regulator-like protein [Mycobacterium smegmatis str. MC2 155] >gi|440626359|gb|ELQ88189.1| protein pafB [My…	234	18.8
19	>CP000480|M_START_Six_Frame_Translated_Orf_62972 (+)4636442:4637485 mtrrcptrvglaapatpssrryrtprrvrflpwgirrrgrqrrvaapparragrrpaagl crprpsvrdrvrsrthpmggntggwlavghsmrAIVYDPLAPANLRfaevdepavaahea lvdvqaialnfgelhfidharkpgeipgwdtagivaqaaadgsgppvgarvvglnfgggw aqrraiatenlavlpefvefeeaaalpvagvtalqalralgpvvgrrVLITGASGGVGRf avqlaarAGAHVIAAVGSPARgagleelgaaevtvgldeisepvfggarqrrrppagagv pargrrwlgavdrdglqrahhdqlrg…	AGAHVIAAVGSPAR AIVYDPLAPANLR VLITGASGGVGR		3.967e-11	1						>CP000480|M_START_GeneMarkS_Sequence_3940 (+)4636715:4637485 mrAIVYDPLAPANLRfaevdepavaahealvdvqaialnfgelhfidharkpgeipgwdt agivaqaaadgsgppvgarVVGLNFGGGWAQRraiatenlavlpefvefeeaaalpvagv talqalralgpvvgrrVLITGASGGVGRfavqlaarAGAHVIAAVGSPARgagleelgaa evtvgldeisepvfggarqrrrppagagvpargrrwlgavdrdglqrahhdqlrggapag lpetvgavrdpdadrr	AGAHVIAAVGSPAR AIVYDPLAPANLR VLITGASGGVGR VVGLNFGGGWAQR		2.1886e-12	1		Six Frame database GeneMarkS database		>Consensus_Protein_Sequence_2136 (+)4636715:4637485 mrAIVYDPLAPANLRfaevdepavaahealvdvqaialnfgelhfidharkpgeipgwdt agivaqaaadgsgppvgarVVGLNFGGGWAQRraiatenlavlpefvefeeaaalpvagv talqalralgpvvgrrVLITGASGGVGRfavqlaarAGAHVIAAVGSPARgagleelgaa evtvgldeisepvfggarqrrrppagagvpargrrwlgavdrdglqrahhdqlrggapag lpetvgavrdpdadrr	(+)4636715:4637485	ATG	Not Verified		Novel		0					0		_VVGLNFGGGWAQR_ _AIVYDPLAPANLR_ _AGAHVIAAVGSPAR_ _VLITGASGGVGR_	FALSE	AGAHVIAAVGSPAR VLITGASGGVGR AIVYDPLAPANLR VVGLNFGGGWAQR						AGAHVIAAVGSPAR VVGLNFGGGWAQR VLITGASGGVGR AIVYDPLAPANLR				FALSE	MRAIVYDPLAPANLRFAEVDEPAVAAHEALVDVQAIALNFGELHFIDHARKPGEIPGWDTAGIVAQAAADGSGPPVGARVVGLNFGGGWAQRRAIATENLAVLPEFVEFEEAAALPVAGVTALQALRALGPVVGRRVLITGASGGVGRFAVQLAARAGAHVIAAVGSPARGAGLEELGAAEVTVGLDEISEPVFGGARQRRRPPAGAGVPARGRRWLGAVDRDGLQRAHHDQLRGGAPAGLPETVGAVRDPDADRR	Alignment E value: 3.07758e-125, length: 304, Feature: gi|504690957|ref|WP_014878059.1| alcohol dehydrogenase [Mycobacterium smegmatis] >gi|116266956|gb|ABJ96324.1| putative oxydoreductase [Mycobacterium smegmatis str. MC2 155] >gi|399233394|gb|AFP40887.1| Alcohol dehydrogenase, zinc-binding protein [Mycobacterium smegmatis str. MC2 155] >gi|698942855|gb|AIU09617.1| alcohol dehydrogenase [Mycobac…	256	20.31
57	>CP000480|M_START_Six_Frame_Translated_Orf_22095 (+)4637301:4637630 mldnvggpllaqafrlvgdggsvqsigmasnepttinfeeerrlgyrkrlepfvirtpia gdlsylltlladgeldpqiglrDSWDNISTAAAALLGRtvagkavlrvs	DSWDNISTAAAALLGR		1.6697e-05	1						>CP000480|M_START_GeneMarkS_Sequence_2453 (+)4637460:4637630 mirtpiagdlsylltlladgeldpqiglrDSWDNISTAAAALLGRtvagkavlrvs	DSWDNISTAAAALLGR		8.1728e-06	1		Six Frame database GeneMarkS database		>Consensus_Protein_Sequence_503 (+)4637523:4637630 mdpqiglrDSWDNISTAAAALLGRtvagkavlrvs	(+)4637523:4637630	TTG	Not Verified		Novel		0					0		_DSWDNISTAAAALLGR_	FALSE	DSWDNISTAAAALLGR						DSWDNISTAAAALLGR				FALSE	MDPQIGLRDSWDNISTAAAALLGRTVAGKAVLRVS	Alignment E value: 3.01823e-13, length: 304, Feature: gi|504690957|ref|WP_014878059.1| alcohol dehydrogenase [Mycobacterium smegmatis] >gi|116266956|gb|ABJ96324.1| putative oxydoreductase [Mycobacterium smegmatis str. MC2 155] >gi|399233394|gb|AFP40887.1| Alcohol dehydrogenase, zinc-binding protein [Mycobacterium smegmatis str. MC2 155] >gi|698942855|gb|AIU09617.1| alcohol dehydrogenase [Mycobact…	35	45.71
26	>CP000480|M_START_Six_Frame_Translated_Orf_62382 (-)3902141:3902404 mstrssptraapsrssttpedaalwrsrLHASADPGRPTNVHLRvagwpnqqyallftdw lrANPGADISDAYRRAWEWADATGWRP	ANPGADISDAYR ANPGADISDAYRR AWEWADATGWRP LHASADPGRPTNVHLR		3.5722e-14	1						>CP000480|M_START_GeneMarkS_Sequence_3472 (-)3902141:3902404 mstrssptraapsrssttpedaalwrsrLHASADPGRPTNVHLRvagwpnqqyallftdw lrANPGADISDAYRRAWEWADATGWRP	ANPGADISDAYR ANPGADISDAYRR AWEWADATGWRP LHASADPGRPTNVHLR		1.9313e-16	1		Six Frame database GeneMarkS database		>Consensus_Protein_Sequence_2113 (-)3902141:3902404 mstrssptraapsrssttpedaalwrsrLHASADPGRPTNVHLRvagwpnqqyallftdw lrANPGADISDAYRRAWEWADATGWRP	(-)3902141:3902404	GTG	Not Verified		Novel		0					0		_ANPGADISDAYRR_ _AWEWADATGWRP_ _ANPGADISDAYR_ _LHASADPGRPTNVHLR_	FALSE	LHASADPGRPTNVHLR ANPGADISDAYRR ANPGADISDAYR AWEWADATGWRP						ANPGADISDAYRR LHASADPGRPTNVHLR ANPGADISDAYR AWEWADATGWRP				FALSE	MSTRSSPTRAAPSRSSTTPEDAALWRSRLHASADPGRPTNVHLRVAGWPNQQYALLFTDWLRANPGADISDAYRRAWEWADATGWRP	Alignment E value: 3.99692e-40, length: 375, Feature: gi|489992221|ref|WP_003895278.1| dephospho-CoA kinase [Mycobacterium smegmatis] >gi|440626698|gb|ELQ88526.1| dephospho-CoA kinase [Mycobacterium smegmatis MKD8]	87	47.13
56	>CP000480|M_START_Six_Frame_Translated_Orf_1669 (-)3901815:3902762 mcgwktpeartiwcnaqsncgstgfcrshvtsrpanrwlprcsrcrsttrgpirrpassr gcrphadiawcasttsgpppcrawmppnvidvqvtvesleiadeladalrAVGYLPLADG VDAVESDARstvaefdhtrgrravaqqaaclgrsraahecpsargglaqpavrvavhrlv agqpgcrhlrrlssrvgvggcdglaalastspprvrtavrrcgaaalspgcrasrrtata trrgpcrpgsssapaptrfsrarpgssrctgrtptggprccprgswwparsgsrrrlpap rrttpagsswcwart	AVGYLPLADGVDAVESDAR		2.126e-06	1												Six Frame database		>Consensus_Protein_Sequence_257 (-)3901815:3902477 mesleiadeladalrAVGYLPLADGVDAVESDARstvaefdhtrgrravaqqaaclgrsr aahecpsargglaqpavrvavhrlvagqpgcrhlrrlssrvgvggcdglaalastspprv rtavrrcgaaalspgcrasrrtatatrrgpcrpgsssapaptrfsrarpgssrctgrtpt ggprccprgswwparsgsrrrlpaprrttpagsswcwart	(-)3901815:3902477	GTG	Not Verified		Novel		0					0		_AVGYLPLADGVDAVESDAR_	FALSE	AVGYLPLADGVDAVESDAR						AVGYLPLADGVDAVESDAR				FALSE	MESLEIADELADALRAVGYLPLADGVDAVESDARSTVAEFDHTRGRRAVAQQAACLGRSRAAHECPSARGGLAQPAVRVAVHRLVAGQPGCRHLRRLSSRVGVGGCDGLAALASTSPPRVRTAVRRCGAAALSPGCRASRRTATATRRGPCRPGSSSAPAPTRFSRARPGSSRCTGRTPTGGPRCCPRGSWWPARSGSRRRLPAPRRTTPAGSSWCWART	Alignment E value: 8.14587e-17, length: 375, Feature: gi|489992221|ref|WP_003895278.1| dephospho-CoA kinase [Mycobacterium smegmatis] >gi|440626698|gb|ELQ88526.1| dephospho-CoA kinase [Mycobacterium smegmatis MKD8]	220	8.64
1	>CP000480|M_START_Six_Frame_Translated_Orf_7228 (+)5497337:5498983 maadradrrcadrrrdrlrhvrrrgaagpgqvlqmdrrlphrgggrnprlrhqgaadrrm aagagrqglrrqrrrrlvqlvrlvrrghpghlqhrshadraavrgvadlhrrraralpea gprflpcvlradrrpggthhirkvdhvkmmpaaktgvaaaaallagfslagcqakesats gdtasgekSNQITVEASDTECKLSGTEAVTGPSTFVVTNNGSKVTEFYVYGQGERVMGEV ENISPGLKRQLIVQLTQPGTYQTSCRPGMVGDGIRGDFVVTGEAVQIDTEGKfkeaadsy kRYVNSQTDALVPAVEEFVAAIKakdv…	ANVEGSQTAVASVRPILDERDPDLGK APDFTIDSTQIAGGAQGLLDEISISK DLWVTGLQPDTDAIADQLVADVK EADLEPGQK FADVEALLEK GDFVVTGEAVQIDTEGK IEPVAESFPDDLDPR ITGEEDIFSHTDLWDFR LSGTEAVTGPSTFVVTNNGSK QLIVQLTQPGTYQTSCRPGMVGDGIR RQLIVQLTQPGTYQTSCRPGMVGDGIR RYVNSQTDALVPAVEEFVAAIK SLYPTTR SNQITVEASDTECK VMGEVENISPGLK VTEFYVYGQGER		0	1						>CP000480|M_START_GeneMarkS_Sequence_5514 (+)5497775:5498983 mkmmpaaktgvaaaaallagfslagcqakesatsgdtasgekSNQITVEASDTECKLSGT EAVTGPSTFVVTNNGSKVTEFYVYGQGERVMGEVENISPGLKRQLIVQLTQPGTYQTSCR PGMVGDGIRGDFVVTGEAVQIDTEGKfkeaadsykRYVNSQTDALVPAVEEFVAAIKakd vekakSLYPTTRiyyerIEPVAESFPDDLDPRidlrEADLEPGQKwtgfhrlekDLWVTG LQPDTDAIADQLVADVKeldagvkAPDFTIDSTQIAGGAQGLLDEISISKITGEEDIFSH TDLWDFRANVEGSQTAVASVRPILDERDPDLGK…	ANVEGSQTAVASVRPILDERDPDLGK APDFTIDSTQIAGGAQGLLDEISISK DLWVTGLQPDTDAIADQLVADVK EADLEPGQK FADVEALLEK GDFVVTGEAVQIDTEGK IEPVAESFPDDLDPR ITGEEDIFSHTDLWDFR LSGTEAVTGPSTFVVTNNGSK QLIVQLTQPGTYQTSCRPGMVGDGIR RQLIVQLTQPGTYQTSCRPGMVGDGIR RYVNSQTDALVPAVEEFVAAIK SLYPTTR SNQITVEASDTECK VMGEVENISPGLK VTEFYVYGQGER		0	1		Six Frame database GeneMarkS database		>Consensus_Protein_Sequence_2528 (+)5497784:5498983 mpaaktgvaaaaallagfslagcqakesatsgdtasgekSNQITVEASDTECKLSGTEAV TGPSTFVVTNNGSKVTEFYVYGQGERVMGEVENISPGLKRQLIVQLTQPGTYQTSCRPGM VGDGIRGDFVVTGEAVQIDTEGKfkeaadsykRYVNSQTDALVPAVEEFVAAIKakdvek akSLYPTTRiyyerIEPVAESFPDDLDPRidlrEADLEPGQKwtgfhrlekDLWVTGLQP DTDAIADQLVADVKeldagvkAPDFTIDSTQIAGGAQGLLDEISISKITGEEDIFSHTDL WDFRANVEGSQTAVASVRPILDERDPDLGKrvdqrFADVEAL…	(+)5497784:5498983	ATG	Not Verified		Novel		0			_QLIVQLTQPGTYQTSCRPGMVGDGIR_		0		_RQLIVQLTQPGTYQTSCRPGMVGDGIR_ _SLYPTTR_ _RYVNSQTDALVPAVEEFVAAIK_ _ITGEEDIFSHTDLWDFR_ _SNQITVEASDTECK_ _VTEFYVYGQGER_ _QLIVQLTQPGTYQTSCRPGMVGDGIR_ _EADLEPGQK_ _APDFTIDSTQIAGGAQGLLDEISISK_ _ANVEGSQTAVASVRPILDERDPDLGK_ _FADVEALLEK_ _LSGTEAVTGPSTFVVTNNGSK_ _GDFVVTGEAVQIDTEGK_ _DLWVTGLQPDTDAIADQLVADVK_ _IEPVAESFPDDLDPR_ _VMGEVENISPGLK_	FALSE	VTEFYVYGQGER RYVNSQTDALVPAVEEFVAAIK APDFTIDSTQIAGGAQGLLDEISISK EADLEPGQK IEPVAESFPDDLDPR VMGEVENISPGLK ITGEEDIFSHTDLWDFR SLYPTTR LSGTEAVTGPSTFVVTNNGSK ANVEGSQTAVASVRPILDERDPDLGK RQLIVQLTQPGTYQTSCRPGMVGDGIR FADVEALLEK SNQITVEASDTECK DLWVTGLQPDTDAIADQLVADVK QLIVQLTQPGTYQTSCRPGMVGDGIR GDFVVTGEAVQIDTEGK						VTEFYVYGQGER RQLIVQLTQPGTYQTSCRPGMVGDGIR RYVNSQTDALVPAVEEFVAAIK VMGEVENISPGLK EADLEPGQK IEPVAESFPDDLDPR APDFTIDSTQIAGGAQGLLDEISISK ITGEEDIFSHTDLWDFR LSGTEAVTGPSTFVVTNNGSK ANVEGSQTAVASVRPILDERDPDLGK SLYPTTR FADVEALLEK SNQITVEASDTECK DLWVTGLQPDTDAIADQLVADVK QLIVQLTQPGTYQTSCRPGMVGDGIR GDFVVTGEAVQIDTEGK				FALSE	MPAAKTGVAAAAALLAGFSLAGCQAKESATSGDTASGEKSNQITVEASDTECKLSGTEAVTGPSTFVVTNNGSKVTEFYVYGQGERVMGEVENISPGLKRQLIVQLTQPGTYQTSCRPGMVGDGIRGDFVVTGEAVQIDTEGKFKEAADSYKRYVNSQTDALVPAVEEFVAAIKAKDVEKAKSLYPTTRIYYERIEPVAESFPDDLDPRIDLREADLEPGQKWTGFHRLEKDLWVTGLQPDTDAIADQLVADVKELDAGVKAPDFTIDSTQIAGGAQGLLDEISISKITGEEDIFSHTDLWDFRANVEGSQTAVASVRPILDERDPDLGKRVDQRFADVEALLEKYREGDGVRHLRQGDRTRTPRAFARHRRAEQRSEPGARCHRPAMTPPAGSRPPLR	Alignment E value: 0.0, length: 402, Feature: gi|399234220|gb|AFP41713.1| UPF0409 lipoprotein [Mycobacterium smegmatis str. MC2 155]	399	64.91
30	>CP000480|M_START_Six_Frame_Translated_Orf_13911 (+)5498604:5498948 mahrvcstrsrsarspvkrtssatptcgtsaptsrarrprwprcdrsstsatpiwasvst saspmskrcwrstvkamgfvtydkVTEPERQELSRAIDALSKEVSQVQGVIAQQ	AIDALSK EVSQVQGVIAQQ VTEPERQELSR		3.0909e-28	1												Six Frame database		>Consensus_Protein_Sequence_156.1 (+)5498856:5498948 VTEPERQELSRAIDALSKEVSQVQGVIAQQ	(+)5498856:5498948	GTG	V	FALSE	Novel		0					0		_VTEPERQELSR_ _EVSQVQGVIAQQ_ _AIDALSK_	FALSE	EVSQVQGVIAQQ AIDALSK VTEPERQELSR						EVSQVQGVIAQQ AIDALSK VTEPERQELSR				FALSE	VTEPERQELSRAIDALSKEVSQVQGVIAQQ	Alignment E value: 5.03974e-09, length: 390, Feature: gi|907610324|ref|WP_049745179.1| peptidase M75 [Mycobacterium goodii] >gi|906353113|gb|AKS32748.1| peptidase M75 [Mycobacterium goodii]	30	100
39	>CP000480|M_START_Six_Frame_Translated_Orf_26317 (+)1499217:1499807 maqkDVLTDLNKVRNIGIMAHIDAGKtttterILYYTGVNYKIGETHDGASTTDWMEQEQ ERgititsaavtcfwnnnqiniidtpghvdftrrggalaararrcgrrvrrqrrrgaavr agvaagrqvrraayllrqqdgqarrglllhrahhrgaprcqaagdpaadrcrerlhrhhr pgrdegqgvarrdrpr	DVLTDLNK IGETHDGASTTDWMEQEQER ILYYTGVNYK NIGIMAHIDAGK VRNIGIMAHIDAGK		5.1201e-137	1												Six Frame database		>Consensus_Protein_Sequence_684 (+)1499217:1499807 maqkDVLTDLNKVRNIGIMAHIDAGKtttterILYYTGVNYKIGETHDGASTTDWMEQEQ ERgititsaavtcfwnnnqiniidtpghvdftrrggalaararrcgrrvrrqrrrgaavr agvaagrqvrraayllrqqdgqarrglllhrahhrgaprcqaagdpaadrcrerlhrhhr pgrdegqgvarrdrpr	(+)1499217:1499807	GTG	Not Verified		Novel		0					0		_IGETHDGASTTDWMEQEQER_ _NIGIMAHIDAGK_ _ILYYTGVNYK_ _DVLTDLNK_ _VRNIGIMAHIDAGK_	FALSE	VRNIGIMAHIDAGK DVLTDLNK ILYYTGVNYK NIGIMAHIDAGK IGETHDGASTTDWMEQEQER						VRNIGIMAHIDAGK DVLTDLNK ILYYTGVNYK IGETHDGASTTDWMEQEQER NIGIMAHIDAGK				FALSE	MAQKDVLTDLNKVRNIGIMAHIDAGKTTTTERILYYTGVNYKIGETHDGASTTDWMEQEQERGITITSAAVTCFWNNNQINIIDTPGHVDFTRRGGALAARARRCGRRVRRQRRRGAAVRAGVAAGRQVRRAAYLLRQQDGQARRGLLLHRAHHRGAPRCQAAGDPAADRCRERLHRHHRPGRDEGQGVARRDRPR	Alignment E value: 3.66728e-56, length: 219, Feature: gi|898441162|emb|CPS87844.1| Elongation factor G (EF-G) [Mycobacterium abscessus]	196	26.53
16	>CP000480|M_START_Six_Frame_Translated_Orf_45040 (+)1499500:1501323 merslrVLDGAVAVFDGKEGVEPQSEQVWRQADKYDVPRicfvnkmdkLGADFYFTVRti eerlgakPLVIQLPIGAENDFIGIIDLVEMKakVWRGETALGEKYEVEDIPADLADKAEE YRtkLLETVAESDEALLEKYFGGEELSVDEIKgairkLTVNSELYPVLCGSAFKnkGVQP MLDAVIDYLPSPLDVESVQGHVPGKEDEVISRKPSVDEPFSALAFKIAVHPFFGKltyvr VYSGVVESGSQVVNSTKgkkerlgkLFQMHANKenpverASAGHIYAVIGLKdtttgdtl cdpneqivlesmtfpdpvievaiepk…	AAQAAQPVILEPIMAVEVTTPEDYMGEVIGDLNSR ANYSMVFDSYAEVPANVSK AQVPLSEMFGYVGDLR ASAGHIYAVIGLK EDEVISR EFKVEANVGKPQVAYR EGVEPQSEQVWR EYIPSVDAGAQDAMQYGVLAGYPLVNLK GETALGEKYEVEDIPADLADK GETALGEKYEVEDIPADLADKAEEYR GQIQAMEER GVQPMLDAVIDYLPSPLDVESVQGHVPGK GVQPMLDAVIDYLPSPLDVESVQGHVPGKEDEVISR IAVHPFFGK KPSVDEPFSALAFK LAEEDPTFK LFQMHANK LGADFYFTVR LGTAIQK LLETVAESDEALLEK LTVNSELYPVLCGSAFK PLVIQLPIGAENDFIGIIDLVE…		0	1						>CP000480|M_START_GeneMarkS_Sequence_4110 (+)1499500:1501323 merslrVLDGAVAVFDGKEGVEPQSEQVWRQADKYDVPRicfvnkmdkLGADFYFTVRti eerlgakPLVIQLPIGAENDFIGIIDLVEMKakVWRGETALGEKYEVEDIPADLADKAEE YRtkLLETVAESDEALLEKYFGGEELSVDEIKgairkLTVNSELYPVLCGSAFKnkGVQP MLDAVIDYLPSPLDVESVQGHVPGKEDEVISRKPSVDEPFSALAFKIAVHPFFGKltyvr VYSGVVESGSQVVNSTKgkkerlgkLFQMHANKenpverASAGHIYAVIGLKdtttgdtl cdpneqivlesmtfpdpvievaiepktksdqek…	AAQAAQPVILEPIMAVEVTTPEDYMGEVIGDLNSR ANYSMVFDSYAEVPANVSK AQVPLSEMFGYVGDLR ASAGHIYAVIGLK EDEVISR EFKVEANVGKPQVAYR EGVEPQSEQVWR EYIPSVDAGAQDAMQYGVLAGYPLVNLK GETALGEKYEVEDIPADLADK GETALGEKYEVEDIPADLADKAEEYR GQIQAMEER GVQPMLDAVIDYLPSPLDVESVQGHVPGK GVQPMLDAVIDYLPSPLDVESVQGHVPGKEDEVISR IAVHPFFGK KPSVDEPFSALAFK LAEEDPTFK LFQMHANK LGADFYFTVR LGTAIQK LLETVAESDEALLEK LTVNSELYPVLCGSAFK PLVIQLPIGAENDFIGIIDLVE…		0	1		Six Frame database GeneMarkS database		>Consensus_Protein_Sequence_1440.1 (+)1499518:1501323 VLDGAVAVFDGKEGVEPQSEQVWRQADKYDVPRicfvnkmdkLGADFYFTVRtieerlga kPLVIQLPIGAENDFIGIIDLVEMKakVWRGETALGEKYEVEDIPADLADKAEEYRtkLL ETVAESDEALLEKYFGGEELSVDEIKgairkLTVNSELYPVLCGSAFKnkGVQPMLDAVI DYLPSPLDVESVQGHVPGKEDEVISRKPSVDEPFSALAFKIAVHPFFGKltyvrVYSGVV ESGSQVVNSTKgkkerlgkLFQMHANKenpverASAGHIYAVIGLKdtttgdtlcdpneq ivlesmtfpdpvievaiepktksdqekLGTAIQKLAEEDP…	(+)1499518:1501323	GTG	V	FALSE	Novel		0					0		_GETALGEKYEVEDIPADLADK_ _GQIQAMEER_ _LGADFYFTVR_ _EGVEPQSEQVWR_ _VHLDQETGQTVIGGMGELHLDILVDR_ _KPSVDEPFSALAFK_ _GVQPMLDAVIDYLPSPLDVESVQGHVPGKEDEVISR_ _GETALGEKYEVEDIPADLADKAEEYR_ _GVQPMLDAVIDYLPSPLDVESVQGHVPGK_ _IAVHPFFGK_ _ASAGHIYAVIGLK_ _VWRGETALGEK_ _VTLLDGAYHEVDSSEMAFK_ _VLIDLEPFVGEDGATYEFENK_ _LTVNSELYPVLCGSAFK_ _LFQMHANK_ _LLETVAESDEALLEK_ _LGTAIQK_ _VYSGVVESGSQVVNSTK_ _EFKVEANVGKPQVAYR_ _VL…	FALSE	EGVEPQSEQVWR VLDGAVAVFDGKEGVEPQSEQVWR IAVHPFFGK VEANVGKPQVAYR VLDGAVAVFDGK GETALGEKYEVEDIPADLADK YEVEDIPADLADKAEEYR EFKVEANVGKPQVAYR GVQPMLDAVIDYLPSPLDVESVQGHVPGK VWRGETALGEKYEVEDIPADLADKAEEYR VHLDQETGQTVIGGMGELHLDILVDR VTLLDGAYHEVDSSEMAFK YEVEDIPADLADK ASAGHIYAVIGLK LGADFYFTVR QADKYDVPR GQIQAMEER KPSVDEPFSALAFK ANYSMVFDSYAEVPANVSK PLVIQLPIGAENDFIGIIDLVEMK LAEEDPTFK AAQAAQPVILEPIMAVEVTTPEDYMGEVIG…						EGVEPQSEQVWR VLDGAVAVFDGKEGVEPQSEQVWR IAVHPFFGK VEANVGKPQVAYR VLDGAVAVFDGK GETALGEKYEVEDIPADLADK YEVEDIPADLADKAEEYR EFKVEANVGKPQVAYR GVQPMLDAVIDYLPSPLDVESVQGHVPGK VWRGETALGEKYEVEDIPADLADKAEEYR VTLLDGAYHEVDSSEMAFK YEVEDIPADLADK ASAGHIYAVIGLK LGADFYFTVR QADKYDVPR LLETVAESDEALLEK GQIQAMEER KPSVDEPFSALAFK ANYSMVFDSYAEVPANVSK PLVIQLPIGAENDFIGIIDLVEMK LAEEDPTFK RGQIQAMEER VWRGETALGEK VHLDQETGQTVIGGMGEL…				FALSE	VLDGAVAVFDGKEGVEPQSEQVWRQADKYDVPRICFVNKMDKLGADFYFTVRTIEERLGAKPLVIQLPIGAENDFIGIIDLVEMKAKVWRGETALGEKYEVEDIPADLADKAEEYRTKLLETVAESDEALLEKYFGGEELSVDEIKGAIRKLTVNSELYPVLCGSAFKNKGVQPMLDAVIDYLPSPLDVESVQGHVPGKEDEVISRKPSVDEPFSALAFKIAVHPFFGKLTYVRVYSGVVESGSQVVNSTKGKKERLGKLFQMHANKENPVERASAGHIYAVIGLKDTTTGDTLCDPNEQIVLESMTFPDPVIEVAIEPKTKSDQEKLGTAIQKLAEEDPTFKVHLDQETGQTVIGGMGELHLDILVDRMRREFKVEANVGKPQVAYRETIKRKVEKVE…	Alignment E value: 0.0, length: 701, Feature: gi|116266976|gb|ABJ96334.1| putative elongation factor G [Mycobacterium smegmatis str. MC2 155] >gi|399230342|gb|AFP37835.1| Elongation factor G [Mycobacterium smegmatis str. MC2 155] >gi|440629274|gb|ELQ91064.1| translation elongation factor G [Mycobacterium smegmatis MKD8] >gi|698939877|gb|AIU06639.1| elongation factor G [Mycobacterium smegmatis str…	601	73.88
40	>CP000480|M_START_Six_Frame_Translated_Orf_32305 (+)5644287:5644796 mhmrftyaeamtdptyyiplaqaaeaagydamtipdsvayplesdskypytpdgnrefld gkafieafvlasalcaatttlnfnffvlklpirppalvakQAGSLNALFDNRLGLGVGTS PWPEDYELMGVPFAKrgkrmdecidiirglttgeyfeyhgefydtprpr	LGLGVGTSPWPEDYELMGVPFAK QAGSLNALFDNR		3.5444e-14	1						>CP000480|M_START_GeneMarkS_Sequence_3671 (+)5644293:5644796 mrftyaeamtdptyyiplaqaaeaagydamtipdsvayplesdskypytpdgnrefldgk afieafvlasalcaatttlnfnffvlklpirppalvakQAGSLNALFDNRLGLGVGTSPW PEDYELMGVPFAKrgkrmdecidiirglttgeyfeyhgefydtprpr	LGLGVGTSPWPEDYELMGVPFAK QAGSLNALFDNR		1.678e-17	1		Six Frame database GeneMarkS database		>Consensus_Protein_Sequence_935 (+)5644578:5644796 makQAGSLNALFDNRLGLGVGTSPWPEDYELMGVPFAKrgkrmdecidiirglttgeyfe yhgefydtprpr	(+)5644578:5644796	GTG	Not Verified		Novel		0					0		_LGLGVGTSPWPEDYELMGVPFAK_ _QAGSLNALFDNR_	FALSE	LGLGVGTSPWPEDYELMGVPFAK QAGSLNALFDNR						LGLGVGTSPWPEDYELMGVPFAK QAGSLNALFDNR				FALSE	MAKQAGSLNALFDNRLGLGVGTSPWPEDYELMGVPFAKRGKRMDECIDIIRGLTTGEYFEYHGEFYDTPRPR	Alignment E value: 7.28642e-40, length: 287, Feature: gi|657268857|ref|WP_029372538.1| hypothetical protein [Mycobacterium sp. UM_WWY]	72	48.61
18	>CP000480|M_START_Six_Frame_Translated_Orf_50401 (+)5644088:5645176 msspstastsvarrvctsrirllicceiasfwltdmfhsgrhrsikdnvacgysdpttpn lehvlvcayavhicrsndrshllhparasgrgrrirrhdhsgqrrlsarirlqvpvhprr qprvprrqgvhrgvragvgpvrgdhdaelqllraqaadppacpggqtgriaqrtvrqpsg srrrhqpvarglrvdgravrqtrqthgrvhrhhpradhrrvlrvprrvlrhaktkMTPAP SKPVPILVGGHADAALRRaarcdgwmhgggepeeldrllarlkqfreehaektgeapsed fqihvisidaftvdgikrledkGVTD…	GVTDVIVGFR IPYIEGQDTEPLDK MTPAPSKPVPILVGGHADAALR MTPAPSKPVPILVGGHADAALRR		5.2533e-31	1						>CP000480|M_START_GeneMarkS_Sequence_5278 (+)5644793:5645176 MTPAPSKPVPILVGGHADAALRRaarcdgwmhgggepeeldrllarlkqfreehaektge apsedfqihvisidaftvdgikrledkGVTDVIVGFRIPYIEGQDTEPLDKkirnlewfa enviakv	GVTDVIVGFR IPYIEGQDTEPLDK MTPAPSKPVPILVGGHADAALR MTPAPSKPVPILVGGHADAALRR		9.0133e-33	1	GeneMarkS_database	Six Frame database GeneMarkS database		>Consensus_Protein_Sequence_1667.1 (+)5644793:5645176 MTPAPSKPVPILVGGHADAALRRaarcdgwmhgggepeeldrllarlkqfreehaektge apsedfqihvisidaftvdgikrledkGVTDVIVGFRIPYIEGQDTEPLDKkirnlewfa enviakv	(+)5644793:5645176	ATG	M	FALSE	Novel		0					0		_MTPAPSKPVPILVGGHADAALR_ _GVTDVIVGFR_ _IPYIEGQDTEPLDK_ _MTPAPSKPVPILVGGHADAALRR_	FALSE	MTPAPSKPVPILVGGHADAALR IPYIEGQDTEPLDK MTPAPSKPVPILVGGHADAALRR GVTDVIVGFR						MTPAPSKPVPILVGGHADAALR IPYIEGQDTEPLDK GVTDVIVGFR MTPAPSKPVPILVGGHADAALRR				FALSE	MTPAPSKPVPILVGGHADAALRRAARCDGWMHGGGEPEELDRLLARLKQFREEHAEKTGEAPSEDFQIHVISIDAFTVDGIKRLEDKGVTDVIVGFRIPYIEGQDTEPLDKKIRNLEWFAENVIAKV	Alignment E value: 2.61819e-85, length: 294, Feature: gi|489993901|ref|WP_003896958.1| hypothetical protein [Mycobacterium smegmatis] >gi|440624885|gb|ELQ86739.1| hypothetical protein D806_5621 [Mycobacterium smegmatis MKD8] >gi|698943812|gb|AIU10574.1| hypothetical protein LJ00_27465 [Mycobacterium smegmatis str. MC2 155] >gi|698953005|gb|AIU17199.1| hypothetical protein LI99_27470 [Mycobacteriu…	127	37.01
66	>CP000480|M_START_Six_Frame_Translated_Orf_42724 (+)1639029:1639436 maltvvgvdignstteasaaaiesdgsvrFLGAALTATTGIKgtpknvdgvaaavtrala eagiapaeldvvllneatpvisglametitetiitestmighdprtpggrglgvgtrsrs trcpkpirvpgstrg	FLGAALTATTGIK		3.8488e-05	1						>CP000480|M_START_GeneMarkS_Sequence_1027 (+)1639029:1639436 maltvvgvdignstteasaaaiesdgsvrFLGAALTATTGIKgtpknvdgvaaavtrala eagiapaeldvvllneatpvisglametitetiitestmighdprtpggrglgvgtrsrs trcpkpirvpgstrg	FLGAALTATTGIK		6.6936e-06	1		Six Frame database GeneMarkS database		>Consensus_Protein_Sequence_1341 (+)1639110:1639436 mrFLGAALTATTGIKgtpknvdgvaaavtralaeagiapaeldvvllneatpvisglame titetiitestmighdprtpggrglgvgtrsrstrcpkpirvpgstrg	(+)1639110:1639436	GTG	Not Verified		Novel		0					0		_FLGAALTATTGIK_	FALSE	FLGAALTATTGIK						FLGAALTATTGIK				FALSE	MRFLGAALTATTGIKGTPKNVDGVAAAVTRALAEAGIAPAELDVVLLNEATPVISGLAMETITETIITESTMIGHDPRTPGGRGLGVGTRSRSTRCPKPIRVPGSTRG	Alignment E value: 2.15128e-47, length: 623, Feature: gi|489989880|ref|WP_003892937.1| diol dehydratase reactivase subunit alpha [Mycobacterium smegmatis] >gi|440629075|gb|ELQ90866.1| propanediol dehydratase, large subunit [Mycobacterium smegmatis MKD8]	108	12.04
33	>CP000480|M_START_Six_Frame_Translated_Orf_220 (+)1639433:1640899 mivvvpkgvdfeaaahtinaatrrgvkvtaailgnddavlvvnrldtripvidevsrida vplgmlaavevagpgqsirtlsnafglatifdldaaatkvvspvaraltgnrsavvvrtp agdvadrtipagslelsgerrkasidvsrgaveimaavervapltdvvgesgtntggmis nvrQSMADLSQHDAADVRIQDLLAVDTFVPQEVRGGVAGEVALENAVALAAMVRtkesgm ravadavrdrlratgatgadvevggveaemavlgalttpgtdqplvvldlgggstdaali eadgtidavhlagagdlvtkLIDAELGL…	AESFFHVR GGVAGEVALENAVALAAMVR IQDLLAVDTFVPQEVR LIDAELGLDNLELAEDIK NAVASGLVAAHAQK QSMADLSQHDAADVR VVALADNGMTPIPTR		9.3945e-38	1						>CP000480|M_START_GeneMarkS_Sequence_73 (+)1639433:1640899 mivvvpkgvdfeaaahtinaatrrgvkvtaailgnddavlvvnrldtrIPVIDEVSRida vplgmlaavevagpgqsirtlsnafglatifdldaaatkvvspvaraltgnrsavvvrtp agdvadrTIPAGSLELSGERrkasidvsrgaveimaavervapltdvvgesgtntggmis nvrQSMADLSQHDAADVRIQDLLAVDTFVPQEVRGGVAGEVALENAVALAAMVRtkesgm ravadavrdrlratgatgadvevggveaemavlgalttpgtdqplvvldlgggstdaali eadgtidavhlagagdlvtkLIDAELGLDNLELAE…	AESFFHVR GGVAGEVALENAVALAAMVR IPVIDEVSR IQDLLAVDTFVPQEVR LIDAELGLDNLELAEDIK NAVASGLVAAHAQK QSMADLSQHDAADVR TIPAGSLELSGER VVALADNGMTPIPTR		2.323e-42	1		GeneMarkS database		>Consensus_Protein_Sequence_500 (+)1639553:1640899 mvnrldtrIPVIDEVSRidavplgmlaavevagpgqsirtlsnafglatifdldaaatkv vspvaraltgnrsavvvrtpagdvadrTIPAGSLELSGERrkasidvsrgaveimaaver vapltdvvgesgtntggmisnvrQSMADLSQHDAADVRIQDLLAVDTFVPQEVRGGVAGE VALENAVALAAMVRtkesgmravadavrdrlratgatgadvevggveaemavlgalttpg tdqplvvldlgggstdaalieadgtidavhlagagdlvtkLIDAELGLDNLELAEDIKry plgkAESFFHVRlengtvqffekalpttafarVVALADNGMTP…	(+)1639553:1640899	GTG	Not Verified		Novel		0					0		_IPVIDEVSR_ _QSMADLSQHDAADVR_ _AESFFHVR_ _LIDAELGLDNLELAEDIK_ _GGVAGEVALENAVALAAMVR_ _TIPAGSLELSGER_ _IQDLLAVDTFVPQEVR_ _NAVASGLVAAHAQK_ _VVALADNGMTPIPTR_	FALSE	NAVASGLVAAHAQK GGVAGEVALENAVALAAMVR LIDAELGLDNLELAEDIK IQDLLAVDTFVPQEVR VVALADNGMTPIPTR AESFFHVR QSMADLSQHDAADVR TIPAGSLELSGER IPVIDEVSR						TIPAGSLELSGER NAVASGLVAAHAQK GGVAGEVALENAVALAAMVR LIDAELGLDNLELAEDIK IQDLLAVDTFVPQEVR VVALADNGMTPIPTR IPVIDEVSR AESFFHVR QSMADLSQHDAADVR				FALSE	MVNRLDTRIPVIDEVSRIDAVPLGMLAAVEVAGPGQSIRTLSNAFGLATIFDLDAAATKVVSPVARALTGNRSAVVVRTPAGDVADRTIPAGSLELSGERRKASIDVSRGAVEIMAAVERVAPLTDVVGESGTNTGGMISNVRQSMADLSQHDAADVRIQDLLAVDTFVPQEVRGGVAGEVALENAVALAAMVRTKESGMRAVADAVRDRLRATGATGADVEVGGVEAEMAVLGALTTPGTDQPLVVLDLGGGSTDAALIEADGTIDAVHLAGAGDLVTKLIDAELGLDNLELAEDIKRYPLGKAESFFHVRLENGTVQFFEKALPTTAFARVVALADNGMTPIPTRHSLERIRAVRRTAKERVFVVNALRALRAIAPAGDLRQIDFVVLLGGCALDFE…	Alignment E value: 0.0, length: 623, Feature: gi|656073484|ref|WP_029104561.1| diol dehydratase reactivase subunit alpha [Mycobacterium smegmatis] >gi|698940022|gb|AIU06784.1| glycerol dehydratase [Mycobacterium smegmatis str. MC2 155] >gi|698949215|gb|AIU13409.1| glycerol dehydratase [Mycobacterium smegmatis] >gi|698957498|gb|AIU20033.1| glycerol dehydratase [Mycobacterium smegmatis]	448	28.57
53	>CP000480|M_START_Six_Frame_Translated_Orf_10340 (-)4146223:4146597 mhqnrgdpghscqylshrcqagaptkrqvkrrkfakyrcaatvrrdltrqsecdlvesvv rpaeevvgvttqinedvrrTAILDAAAQLIAERgyhavriadiaalvgtaparctttfpa skkc	TAILDAAAQLIAER		1.4883e-11	1												Six Frame database		>Consensus_Protein_Sequence_16 (-)4146223:4146399 mgvttqinedvrrTAILDAAAQLIAERgyhavriadiaalvgtaparctttfpaskkc	(-)4146223:4146399	GTG	Not Verified		Novel		0					0		_TAILDAAAQLIAER_	FALSE	TAILDAAAQLIAER						TAILDAAAQLIAER				FALSE	MGVTTQINEDVRRTAILDAAAQLIAERGYHAVRIADIAALVGTAPARCTTTFPASKKC	Alignment E value: 6.49844e-21, length: 202, Feature: gi|489992488|ref|WP_003895545.1| TetR family transcriptional regulator [Mycobacterium smegmatis] >gi|440626568|gb|ELQ88398.1| transcriptional regulator, TetR family protein [Mycobacterium smegmatis MKD8] >gi|698942412|gb|AIU09174.1| TetR family transcriptional regulator [Mycobacterium smegmatis str. MC2 155] >gi|698951605|gb|AIU15799.1| TetR f…	58	24.14
31	>CP000480|M_START_Six_Frame_Translated_Orf_78834 (-)4145792:4146259 mhyyfpgkQEVLTAALQHAVDRsfdrqsvelvkidnahqrllklfdmqlprpgpvrdews iwmqfwaeatirpelrpvhntyyarwhetvsrivkrgqrqgvfrsdidpetvakRLTALT DGVAIQVVTGAPDMTVSAMKeflvqfvqdellrrp	QEVLTAALQHAVDR RLTALTDGVAIQVVTGAPDMTVSAMK		1.9251e-06	1						>CP000480|M_START_GeneMarkS_Sequence_6440 (-)4145792:4146259 mhyyfpgkQEVLTAALQHAVDRsfdrqsvelvkidnahqrllklfdmqlprpgpvrdews iwmqfwaeatirpelrpvhntyyarWHETVSRivkrgqrqgvfrsdidpetvakRLTALT DGVAIQVVTGAPDMTVSAMKeflvqfvqdellrrp	QEVLTAALQHAVDR RLTALTDGVAIQVVTGAPDMTVSAMK WHETVSR		1.0959e-09	1		Six Frame database GeneMarkS database		>Consensus_Protein_Sequence_2821 (-)4145792:4146259 mhyyfpgkQEVLTAALQHAVDRsfdrqsvelvkidnahqrllklfdmqlprpgpvrdews iwmqfwaeatirpelrpvhntyyarWHETVSRivkrgqrqgvfrsdidpetvakRLTALT DGVAIQVVTGAPDMTVSAMKeflvqfvqdellrrp	(-)4145792:4146259	GTG	Not Verified		Novel		0					0		_QEVLTAALQHAVDR_ _RLTALTDGVAIQVVTGAPDMTVSAMK_ _WHETVSR_	FALSE	QEVLTAALQHAVDR RLTALTDGVAIQVVTGAPDMTVSAMK WHETVSR						QEVLTAALQHAVDR WHETVSR RLTALTDGVAIQVVTGAPDMTVSAMK				FALSE	MHYYFPGKQEVLTAALQHAVDRSFDRQSVELVKIDNAHQRLLKLFDMQLPRPGPVRDEWSIWMQFWAEATIRPELRPVHNTYYARWHETVSRIVKRGQRQGVFRSDIDPETVAKRLTALTDGVAIQVVTGAPDMTVSAMKEFLVQFVQDELLRRP	Alignment E value: 1.72756e-109, length: 155, Feature: gi|399232939|gb|AFP40432.1| TetR family transcriptional regulator [Mycobacterium smegmatis str. MC2 155]	155	30.32
[truncated: 33 more columns]
